# Supplementary material
Source: PubMed Central journal article supplement (PMC522043)

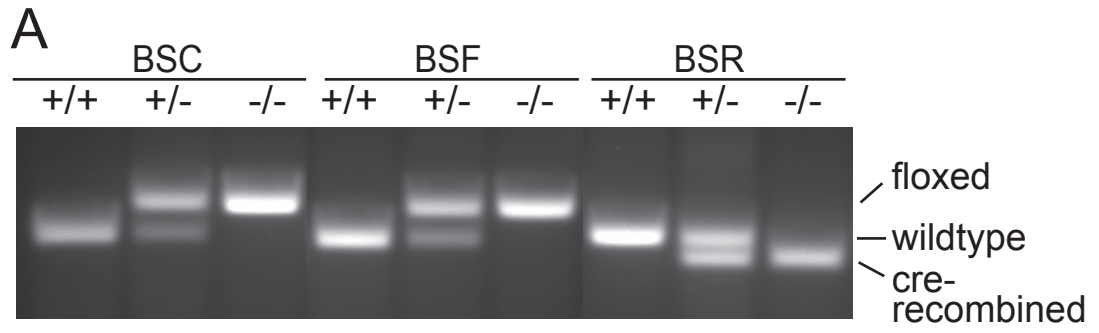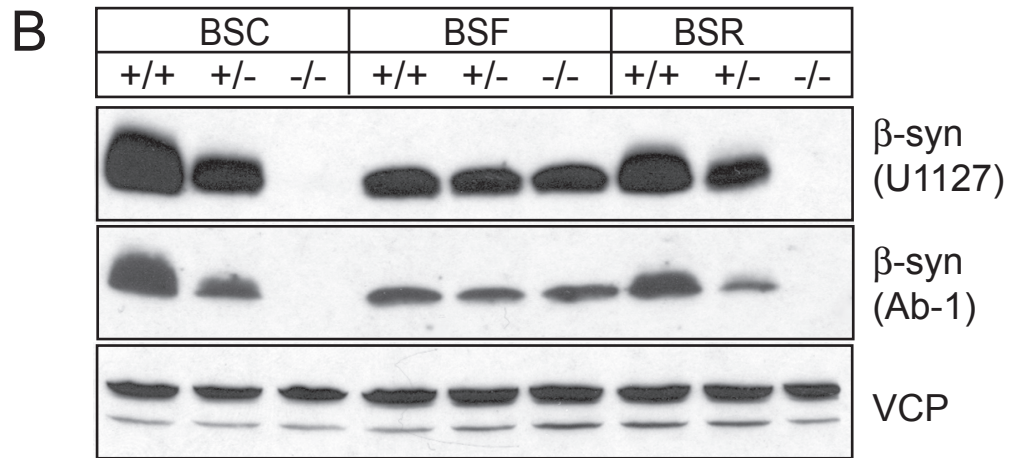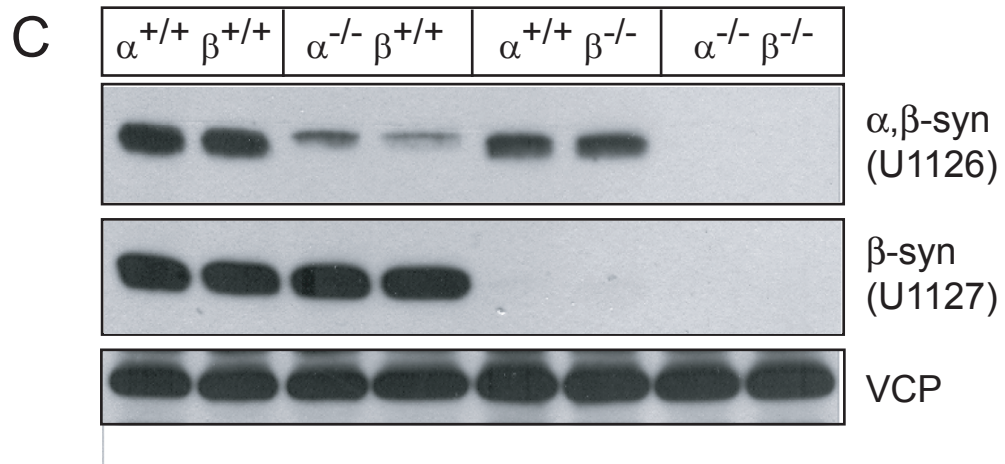

Supplement: pnas_101_41_14966__2.pdf [file pnas_101_41_14966__2.pdf]

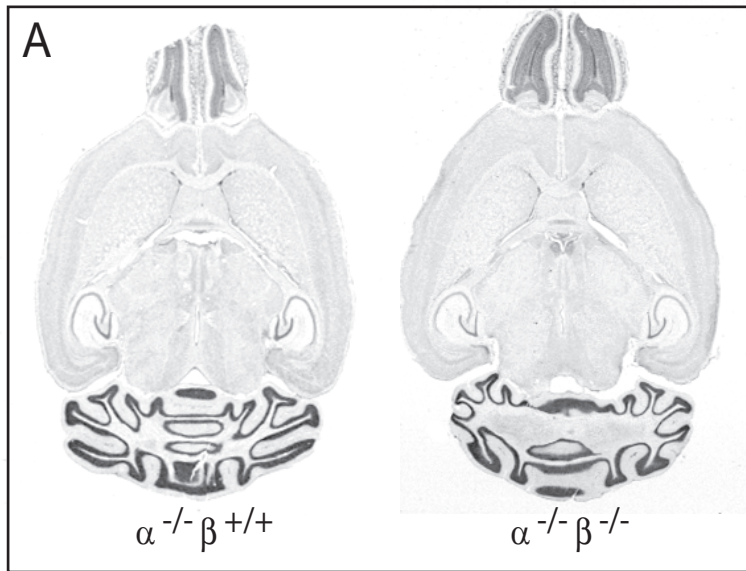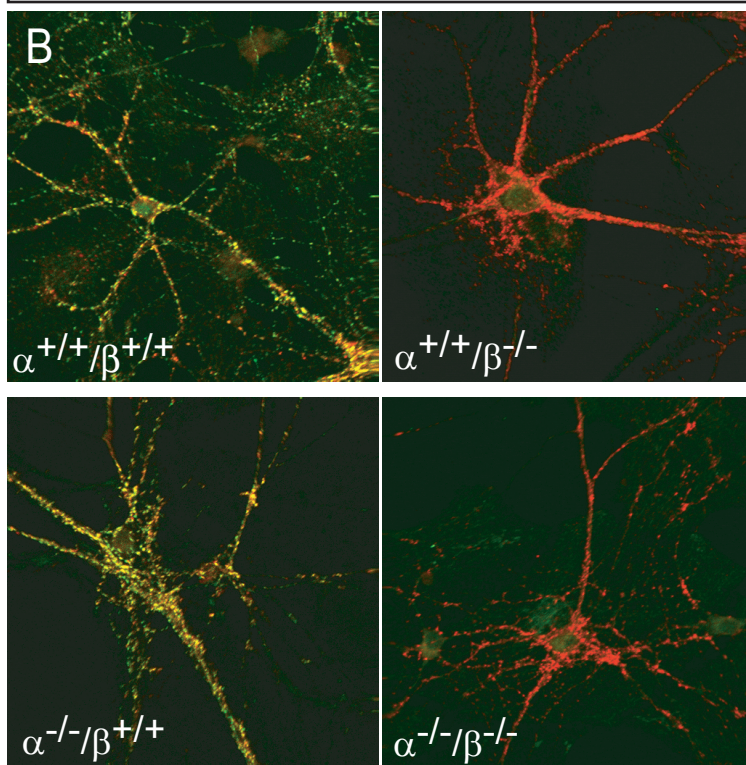

Supplement: pnas_101_41_14966__3.pdf [file pnas_101_41_14966__3.pdf]

### K<sup>+</sup>-Induced Synapse Destaining

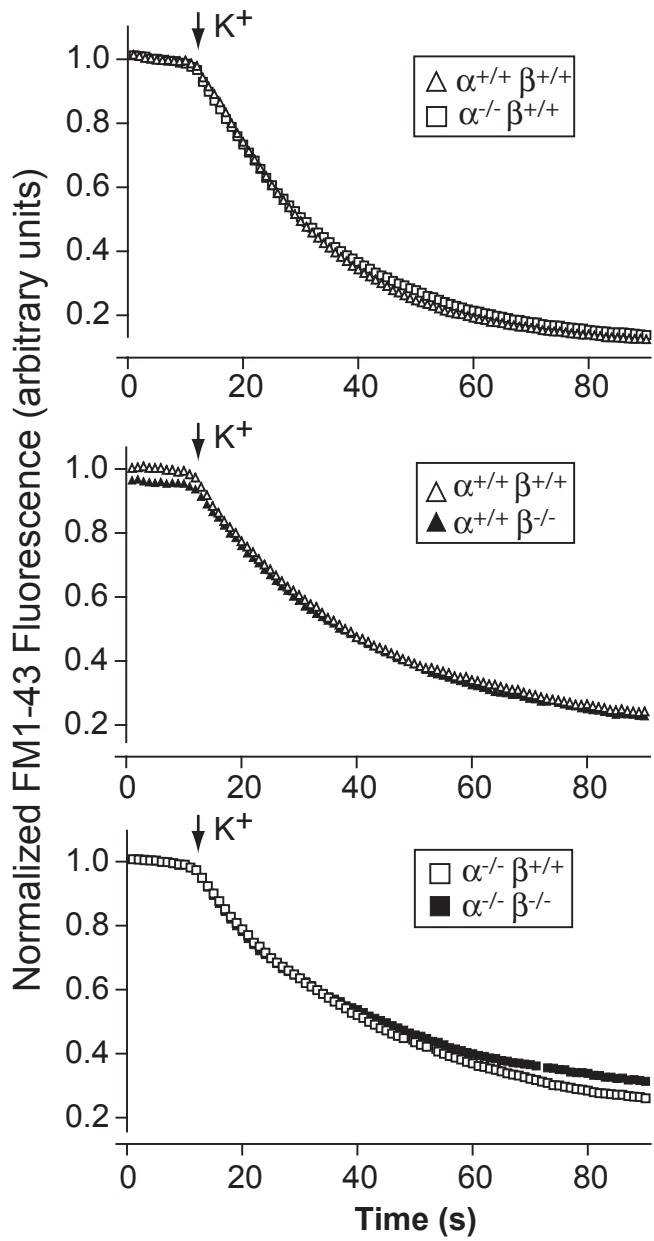

Supplement: pnas_101_41_14966__4.pdf [file pnas_101_41_14966__4.pdf]

# Long-term Potentiation

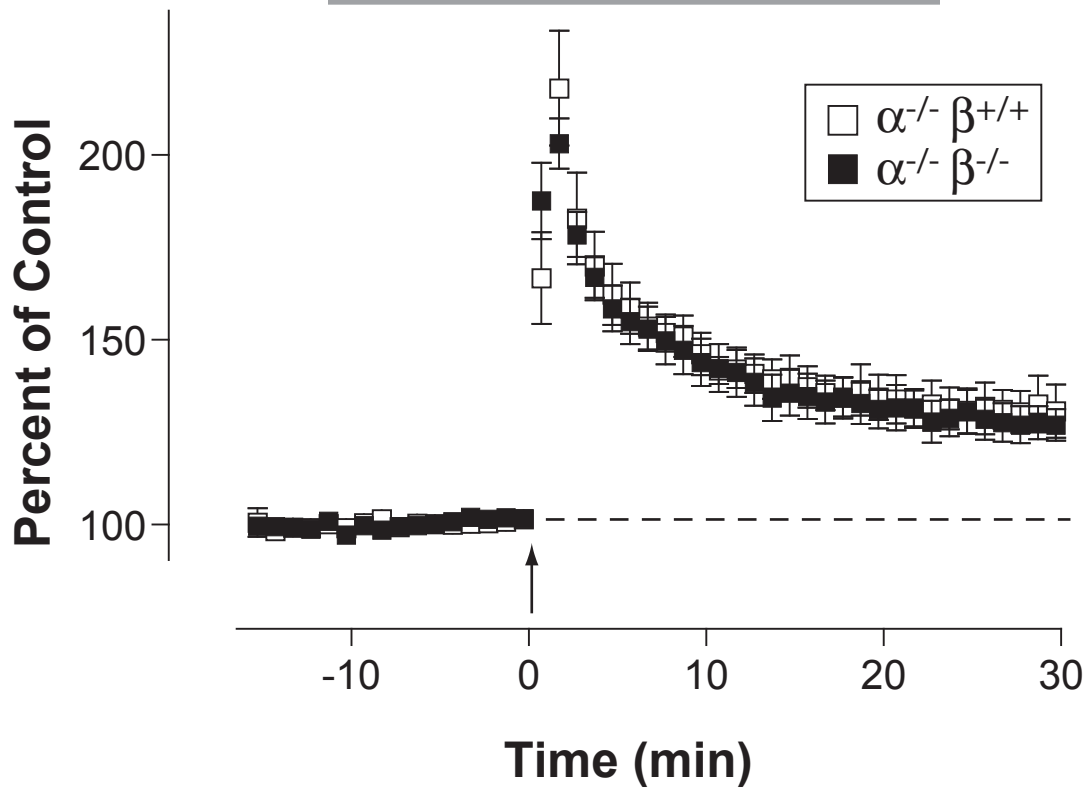

Supplement: pnas_101_41_14966__6.pdf [file pnas_101_41_14966__6.pdf]

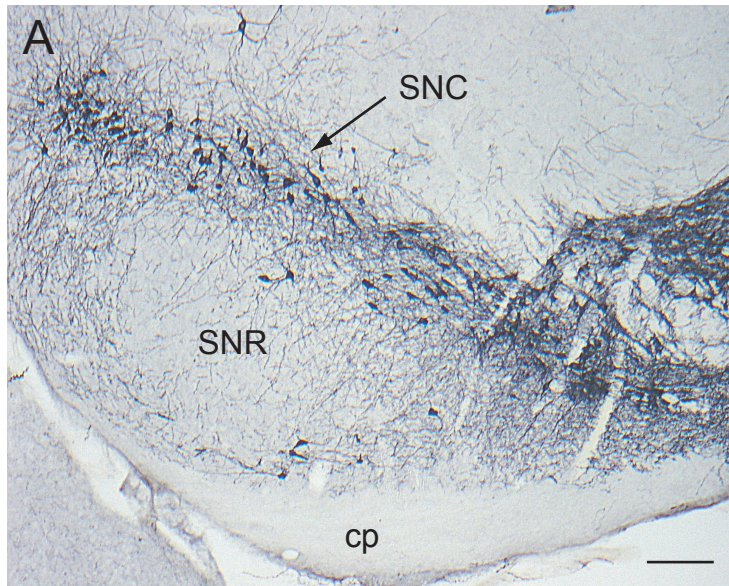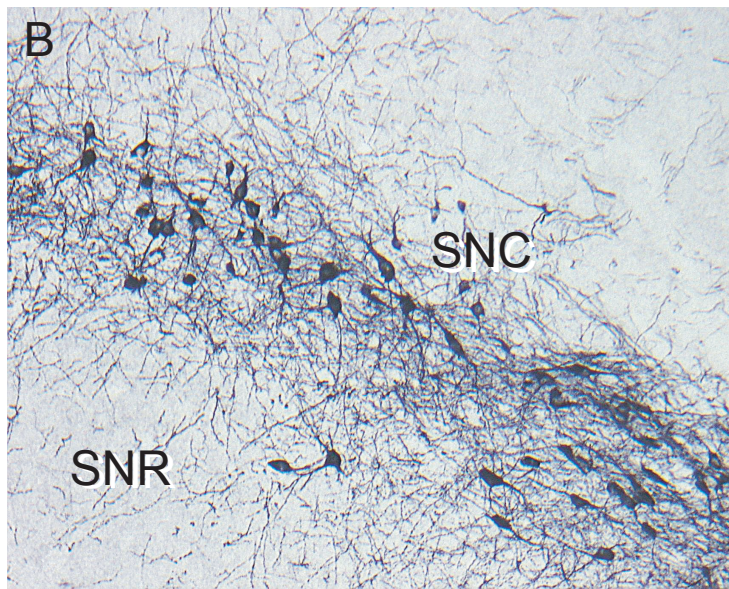

Supplement: pnas_101_41_14966__7.pdf [file pnas_101_41_14966__7.pdf]
